# Supplementary material
Source: PubMed Central journal article supplement (PMC7356756)
Supplement: ONCO-25-e1098-s001.pdf [file ONCO-25-e1098-s001.pdf]

**Supplementary Table 1. Main variables definitions using Ontario healthcare databases.**

| Variable                                | Data source                                                                     | Code strategy                                                                                                                                                                                                                                                                                                                                                                                             |
|-----------------------------------------|---------------------------------------------------------------------------------|-----------------------------------------------------------------------------------------------------------------------------------------------------------------------------------------------------------------------------------------------------------------------------------------------------------------------------------------------------------------------------------------------------------|
| <b>Cancer diagnosis</b>                 | Ontario Cancer Registry (OCR)                                                   | ICD-O.3 topography<br>Oropharyngeal: C000-C148, C760<br>Gastro-intestinal: C150-269, C480-482, C488, C762-763<br>Respiratory: C300-349, C381-399, C761<br>Breast: C500-509<br>Gynecologic: C510-589<br>Genito-urinary: C600-639, C649, C659, C681, C688, C669-680, C689                                                                                                                                   |
| <b>Age at diagnosis</b>                 | OCR                                                                             | -                                                                                                                                                                                                                                                                                                                                                                                                         |
| <b>Sex</b>                              | Registered Person database (RPDB)                                               | -                                                                                                                                                                                                                                                                                                                                                                                                         |
| <b>Income quintile</b>                  | Canadian Census Registered person database (RPDB)                               | Ecologic measure of income [1]                                                                                                                                                                                                                                                                                                                                                                            |
| <b>Rural residence</b>                  | RPDB                                                                            | Rural index of Ontario [2]                                                                                                                                                                                                                                                                                                                                                                                |
| <b>Year of diagnosis</b>                | OCR                                                                             | -                                                                                                                                                                                                                                                                                                                                                                                                         |
| <b>Comorbidity burden</b>               | CIHI-Discharge abstract database (DAD)<br>CIHI – Same day surgery (SDS)<br>OHIP | ICD codes for Johns Hopkins Adjusted Clinical Groups [3,4]                                                                                                                                                                                                                                                                                                                                                |
| <b>High depression score</b>            | Symptoms management database                                                    | First ESAS depression score $\geq 2$ from date of diagnosis to 6 months following date of diagnosis in the Symptom Management Database                                                                                                                                                                                                                                                                    |
| <b>Receipt of chemotherapy</b>          | OHIP                                                                            | $\geq 1$ cycle of chemotherapy defined as: OHIP codes G381, G281, G339, G345, G359                                                                                                                                                                                                                                                                                                                        |
| <b>Palliative care assessment</b>       | OHIP                                                                            | <b>Billing codes:</b> A901 (only if billed with B997 or B998), A902 (only if billed with B997 or B998), A945, C882, C945, C982, G511, G512, K015, K023, K700, W872, W882, W982 [5]<br><b>Timeframe:</b> 30 days before to 30 days after date of first high depression score                                                                                                                               |
| <b>Psychiatry/Psychology assessment</b> | OHIP<br>ALR                                                                     | <b>Psychiatry:</b> billing codes A195, A895, A190, A795, K630, C895, C190, C395, C196, C795, C695, C193, C194, W895, W190, W795, W395, W196, K620, K623, K624, K629, K198, K199, K197, K190<br><b>Psychology:</b> ALR psychology flag<br><b>Timeframe:</b> 30 days before to 30 days after date of first high depression score                                                                            |
| <b>Social work referral</b>             | Activity Level Reporting (ALR)                                                  | ALR social work flag<br><b>Timeframe:</b> 30 days before to 30 days after date of first high depression score                                                                                                                                                                                                                                                                                             |
| <b>Anti-depressant therapy</b>          | Ontario Drug Database (ODB)                                                     | Patients $\geq 65$ years old<br>DIN for fluoxetine, fluvoxamine, sertraline, paroxetine, citalopram, escitalopram, trazodone, amitriptyline, clomipramine, trimipramine, doxepin, nortriptyline, desipramine, venlafaxine, duloxetine, bupropion, mirtazapine, phenelzine, selegiline, tranylcypromine, ritalin.<br><b>Timeframe:</b> 30 days before to 30 days after date of first high depression score |
| <b>Death</b>                            | RPDB                                                                            | Date of death                                                                                                                                                                                                                                                                                                                                                                                             |

1) Alter DA, Naylor CD, Austin P, *et al.* Effects of socioeconomic status on access to invasive cardiac procedures and on mortality after acute myocardial infarction. *N Engl J Med* 1999;**341**:1359–67. 2) Kralj B. Measuring ‘rurality’ for purposes of health-care planning: an empirical measure for Ontario. *Ont Med Rev* 2000;**67**:33–52. 3) Reid RJ, Roos NP, MacWilliam L, *et al.* Assessing population health care need using a claims-based ACG morbidity measure: a validation analysis in the Province of Manitoba. *Health Serv Res* 2002;**37**:1345–64. 4) Reid RJ, MacWilliam L, Verhulst L, *et al.* Performance of the ACG case-mix system in two Canadian provinces. *Med Care* 2001;**39**:86–99. 5) Merchant SJ, Brogly SB, Goldie C, *et al.* Palliative Care is Associated with Reduced Aggressive End-of-Life Care in Patients with Gastrointestinal Cancer. *Ann Surg Oncol* 2018;**25**:1478–87.

**Supplementary Figure 1. Time windows for capture of intervention around the time of positive depression symptom screening (A) and measure of change in ESAS depression-item score (B).**

**A**

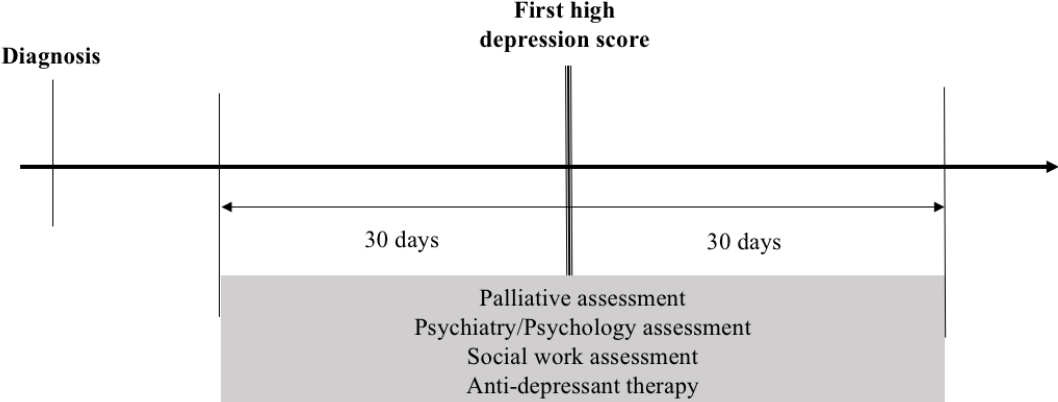

**B**

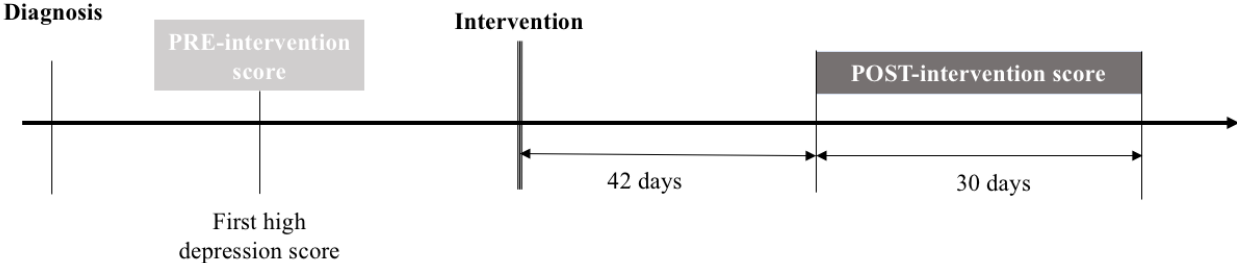

**Supplementary Table 2. Results of sensitivity analysis using ESAS depression score  $\geq 4$  to define depression symptom, showing patient characteristics (A),**

**2A. Characteristics of patients stratified by patient-reported depression score (ESAS depression  $\geq 4$ ).**

| Variable                                 |                           | Patient-reported depression<br>(n=38,486) | No patient-reported depression<br>(n=103,784) | p-value |
|------------------------------------------|---------------------------|-------------------------------------------|-----------------------------------------------|---------|
| Age (years old)                          | $\leq 60$                 | 18,302 (31.6%)                            | 39,677 (68.4%)                                | <0.001  |
|                                          | 61-70                     | 11,048 (25.3%)                            | 32,686 (74.7%)                                |         |
|                                          | 71-80                     | 6,571 (22.4%)                             | 22,738 (77.6%)                                |         |
|                                          | $\geq 81$                 | 2,565 (22.8%)                             | 8,683 (77.2%)                                 |         |
| Sex                                      | Female                    | 23,946 (28.8%)                            | 59,138 (71.2%)                                | <0.001  |
|                                          | Male                      | 14,540 (24.6%)                            | 44,646 (75.4%)                                |         |
| Rural residence                          | Yes                       | 3,448 (23.1%)                             | 11,494 (76.9%)                                | <0.001  |
|                                          | No                        | 35,038 (27.5%)                            | 92,290 (72.5%)                                |         |
| High comorbidity burden (ACG $\geq 10$ ) | Yes                       | 9,316 (33.2%)                             | 18,712 (66.8%)                                | <0.001  |
|                                          | No                        | 29,170 (25.5%)                            | 85,072 (74.5%)                                |         |
| Income quintile                          | 1 <sup>st</sup> (lowest)  | 7,345 (30.5%)                             | 16,758 (69.5%)                                | <0.001  |
|                                          | 2 <sup>nd</sup>           | 7,641 (28.0%)                             | 19,609 (72.0%)                                |         |
|                                          | 3 <sup>rd</sup>           | 7,642 (27.0%)                             | 20,683 (73.0%)                                |         |
|                                          | 4 <sup>th</sup>           | 8,142 (26.2%)                             | 22,921 (73.8%)                                |         |
|                                          | 5 <sup>th</sup> (highest) | 7,716 (24.5%)                             | 23,813 (75.5%)                                |         |
| Cancer diagnosis type                    | Breast                    | 10,472 (25.5%)                            | 30,616 (74.5%)                                | <0.001  |
|                                          | Gastro-intestinal         | 9,450 (27.9%)                             | 24,422 (72.1%)                                |         |
|                                          | Genito-urinary            | 3,791 (16.1%)                             | 19,733 (83.9%)                                |         |
|                                          | Gynecologic               | 4,455 (28.3%)                             | 11,307 (71.7%)                                |         |
|                                          | Oropharyngeal             | 2,640 (37.5%)                             | 4,394 (62.5%)                                 |         |
|                                          | Respiratory               | 7,678 (36.6%)                             | 13,312 (63.4%)                                |         |
| Time period of diagnosis                 | 2010-2014                 | 24,945 (26.9%)                            | 67,681 (73.1%)                                | 0.162   |
|                                          | 2015-2017                 | 13,541 (27.3%)                            | 36,103 (72.7%)                                |         |
| Subsequent second cancer diagnosis       | Yes                       | 1,295 (27.1%)                             | 3,477 (72.9%)                                 | 0.892   |
|                                          | No                        | 37,191 (27.0%)                            | 100,307 (73.0%)                               |         |
| Receipt of systemic therapy              | Yes                       | 23,648 (33.9%)                            | 46,076 (66.1%)                                | <0.001  |
|                                          | No                        | 14,838 (20.5%)                            | 57,708 (79.5%)                                |         |

**2B. Receipt of psycho-social intervention in patients with patient-reported depression (ESAS depression  $\geq 4$ ).**

| <b>Psycho-social intervention</b>       | <b>All patients with patient-reported depression<br/>(n=38,486)</b> | <b>Patients <math>\geq 65</math> years old with patient-reported depression<br/>(n=14,584)</b> |
|-----------------------------------------|---------------------------------------------------------------------|------------------------------------------------------------------------------------------------|
| <b>Chemotherapy</b>                     | 23,648 (61.5)                                                       | -                                                                                              |
| <b>Palliative assessment</b>            | 7,675 (19.9)                                                        |                                                                                                |
| <b>Psychiatry/psychology assessment</b> | 886 (2.3)                                                           |                                                                                                |
| <b>Social work referral</b>             | 3,707 (9.6)                                                         |                                                                                                |
| <b>Anti-depressant therapy</b>          | -                                                                   | 829 (5.6)                                                                                      |

Values are n (%) showing column percentages.

**2C. Change in ESAS depression score following psycho-social intervention with patient-reported depression (ESAS depression  $\geq 4$ ).**

| <b>Psycho-social intervention</b>                    | <b>Reduction<br/>(<math>\geq 1</math> point on<br/>ESAS score)</b> | <b>Stability<br/>(no change)</b> | <b>Increase<br/>(<math>\geq 1</math> point on<br/>ESAS score)</b> |
|------------------------------------------------------|--------------------------------------------------------------------|----------------------------------|-------------------------------------------------------------------|
| <b>Palliative care assessment (n=4,460)</b>          | 76.6%                                                              | 10.5%                            | 12.9%                                                             |
| <b>Psychiatry/psychology assessment (n=422)</b>      | 69.9%                                                              | 14.0%                            | 16.1%                                                             |
| <b>Social work referral for depression (n=2,448)</b> | 75.1%                                                              | 12.0%                            | 12.9%                                                             |
| <b>Anti-depressant therapy* (n=425)</b>              | 77.4%                                                              | 10.1%                            | 12.5%                                                             |

\*In patients  $\geq 65$  years old.

**Supplementary Table 3. Results of sensitivity analysis using time window from 30 days prior to 90 days following ESAS depression score to measure psycho-social interventions.**

**3A. Receipt of psycho-social intervention in patients with patient-reported depression.**

| <b>Psycho-social intervention</b>       | <b>All patients with patient-reported depression<br/>(n=65,424)</b> | <b>Patients &gt;65 years old with patient-reported depression<br/>(n=26,125)</b> |
|-----------------------------------------|---------------------------------------------------------------------|----------------------------------------------------------------------------------|
| <b>Palliative assessment</b>            | 15,027 (23.0)                                                       | -                                                                                |
| <b>Psychiatry/psychology assessment</b> | 1,983 (3.0)                                                         |                                                                                  |
| <b>Social work referral</b>             | 6,959 (10.6)                                                        |                                                                                  |
| <b>Anti-depressant therapy</b>          | -                                                                   | 2,455 (9.4)                                                                      |

Values are n (%) showing column percentages.

**3B. Change in ESAS depression score following psycho-social intervention with patient-reported depression.**

| <b>Psycho-social intervention</b>                           | <b>Reduction<br/>( ≥1 point on ESAS score)</b> | <b>Stability<br/>(no change)</b> | <b>Increase<br/>( ≥1 point on ESAS score)</b> |
|-------------------------------------------------------------|------------------------------------------------|----------------------------------|-----------------------------------------------|
| <b>Palliative care assessment (n=7,969)</b>                 | 67.2%                                          | 13.3%                            | 19.6%                                         |
| <b>Psychiatry assessment or psychology referral (n=813)</b> | 63.4%                                          | 14.3%                            | 22.4%                                         |
| <b>Social work referral for depression (n=4,378)</b>        | 66.6%                                          | 14.1%                            | 19.3%                                         |
| <b>Anti-depressant assessment for depression (n=940)</b>    | 70.9%                                          | 10.4%                            | 18.7%                                         |

\*In patients ≥65 years old.
